# Supplementary material for: Two Ln-based metal–organic frameworks based on the 5-(1H-1,2,4-triazol-1-yl)-1,3-benzenedicarboxylic acid ligand: syntheses, structures, and photocatalytic properties
Source: Royal Society of Chemistry journal article supplement (doi:10.1039/d0ra07159e), 2020-01-01
Supplement: d0ra07159e1.pdf [file d0ra07159e1.pdf]

## Supporting Information

### Two Ln-based metal-organic frameworks based on 5-(1H-1,2,4-triazol-1-yl)-1,3-benzenedicarboxylic acid ligand: Syntheses, structures, and photocatalytic properties

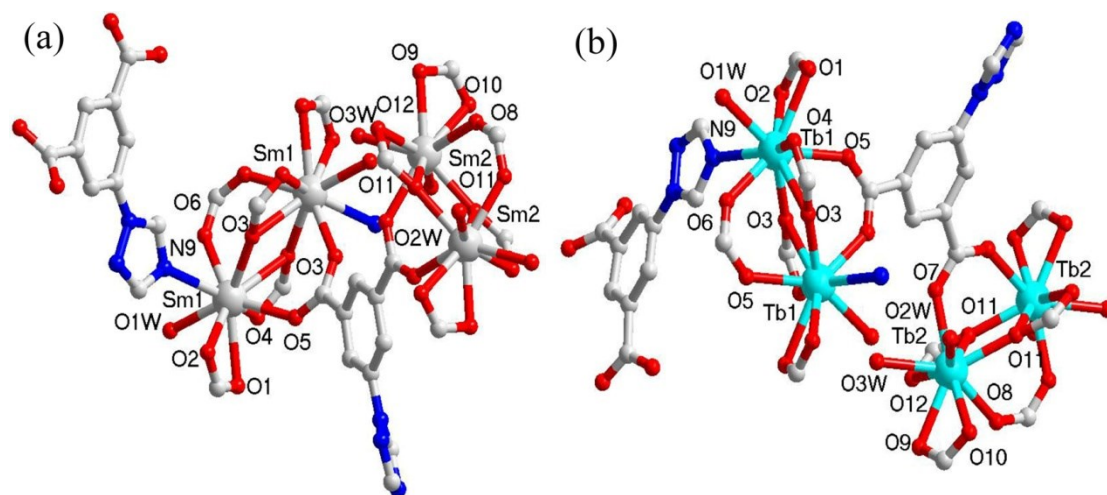

Fig. S1 view of the coordination modes of H<sub>2</sub>L ligands in **MOF-Sm** and **MOF-Tb**.

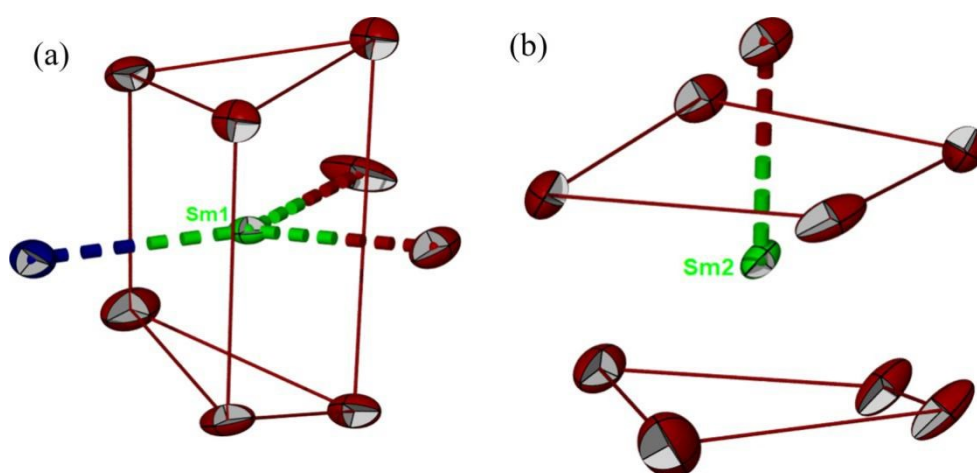

Fig. S2 view of the coordination geometries of Sm center in **MOF-Sm**.

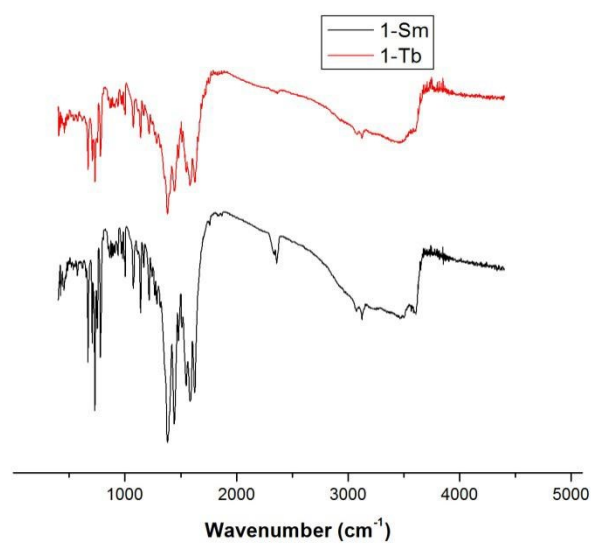

Fig. S3 view of the IR of **MOF-Sm** (black) and **MOF-Tb** (red).

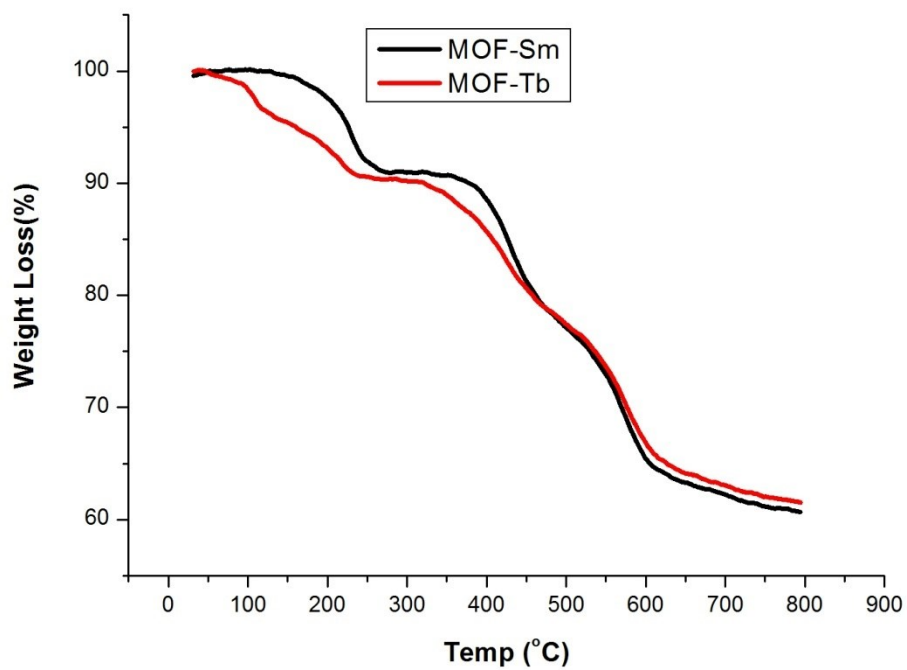

Fig. S4 view of the TGA.

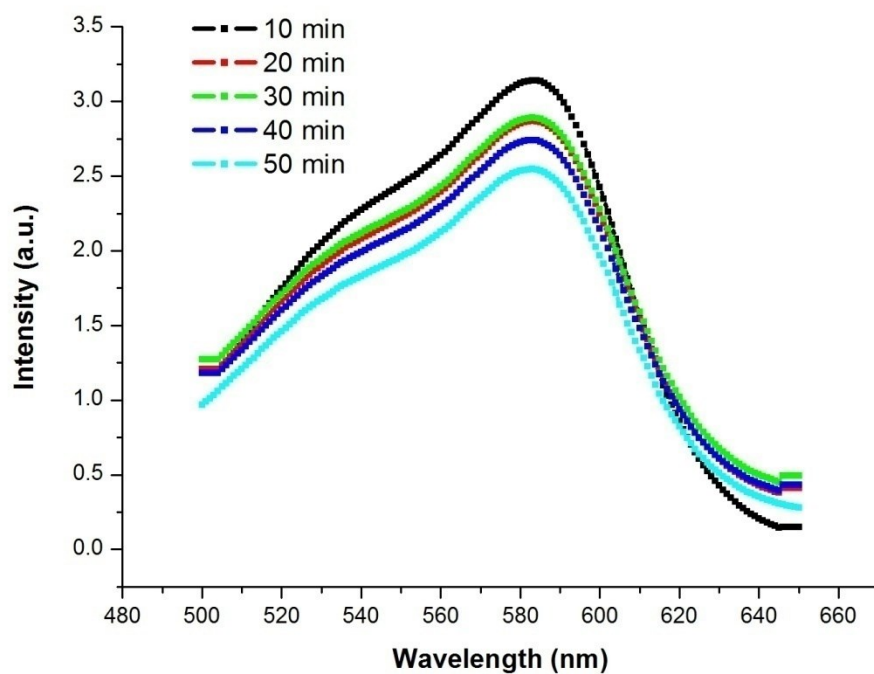

Fig. S5 Absorption spectra of the MV solutions during the decomposition reaction under UV irradiation without any catalysts.

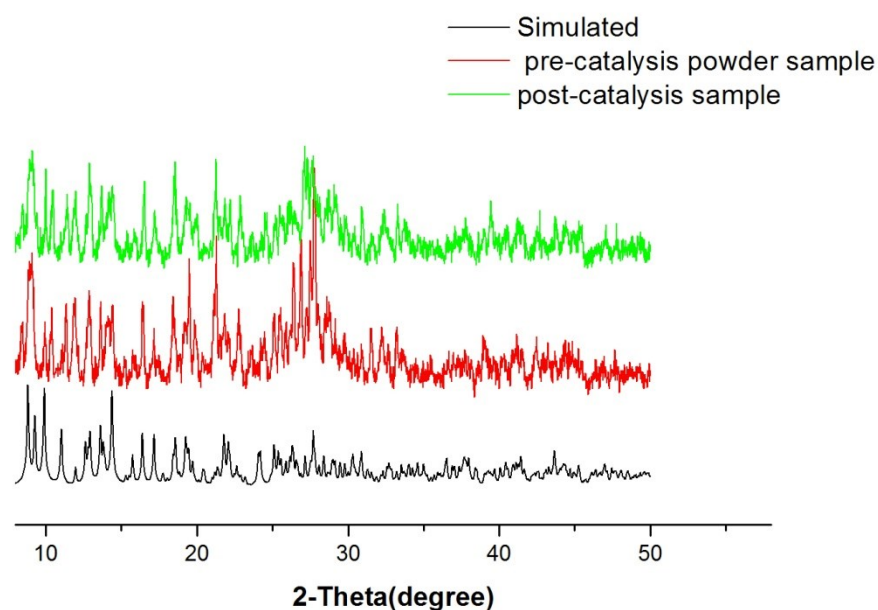

Fig. S6 X-Ray power diffraction diagram of the simulated spectra from single crystal data of **MOF-Sm** (black), **MOF-Sm** (red), and after a photocatalysis process (green).

**Table S1. Crystallographic data and structural refinement parameters for MOFs<sup>a</sup>**

| Compounds         | <b>MOF-Sm</b>               | <b>MOF-Tb</b>               |
|-------------------|-----------------------------|-----------------------------|
| Empirical formula | $C_{30}H_{27}N_9O_{18}Sm_2$ | $C_{30}H_{27}N_9O_{18}Tb_2$ |
| Formula weight    | 1102.30                     | 1119.44                     |
| Crystal system    | Triclinic                   | Triclinic                   |
| Space group       | P -1                        | P -1                        |
| a /Å              | 9.9847(8)                   | 9.9419(6)                   |
| b /Å              | 13.2497(10)                 | 13.1775(8)                  |
| c /Å              | 14.3535(11)                 | 14.3215(9)                  |

|                                                                                                        |                |                |
|--------------------------------------------------------------------------------------------------------|----------------|----------------|
| $\alpha/^\circ$                                                                                        | 81.6299(12)    | 81.7900(9)     |
| $\beta/^\circ$                                                                                         | 73.8538(10)    | 74.0669(9)     |
| $\gamma/^\circ$                                                                                        | 83.2186(11)    | 83.0217(10)    |
| $V/\text{\AA}^3$                                                                                       | 1798.5(2)      | 1778.99(19)    |
| Z                                                                                                      | 2              | 2              |
| $\rho_{\text{calc}} (\text{g} \cdot \text{cm}^{-3})$                                                   | 2.035          | 2.090          |
| $\mu (\text{mm}^{-1})$                                                                                 | 3.328          | 4.039          |
| F (000)                                                                                                | 1076           | 1088           |
| Reflections collected                                                                                  | 9883           | 10964          |
| Reflections unique                                                                                     | 7090           | 8147           |
| S on $F^2$                                                                                             | 1.024          | 1.046          |
| $R_{\text{int}}$                                                                                       | 0.0137         | 0.0158         |
| parameters                                                                                             | 532            | 532            |
| $R_1, wR_2^a [I > 2\sigma(I)]$                                                                         | 0.0234, 0.0608 | 0.0260, 0.0693 |
| $R_1, wR_2^a (\text{all data})$                                                                        | 0.0270, 0.0628 | 0.0286, 0.0708 |
| $^a R_1 = \sum   F_o  -  F_c   / \sum  F_o , wR_2 = [\sum w(F_o^2 - F_c^2)^2 / \sum w(F_o^2)^2]^{1/2}$ |                |                |

**Table S2.** Selected bond distances / $\text{\AA}$  and bond angles / $^\circ$  for MOFs.

| <b>MOF-Sm</b> |          |               |          |
|---------------|----------|---------------|----------|
| Sm(1)-O(6)#1  | 2.369(2) | Sm(1)-O(2)    | 2.397(2) |
| Sm(1)-O(5)    | 2.406(3) | Sm(1)-O(3)#2  | 2.431(2) |
| Sm(1)-O(4)#3  | 2.448(2) | Sm(1)-O(1W)   | 2.470(3) |
| Sm(1)-O(1)    | 2.593(2) | Sm(1)-N(9)#4  | 2.619(3) |
| Sm(1)-O(3)#3  | 2.718(2) | Sm(2)-O(7)#5  | 2.369(2) |
| Sm(2)-O(11)#6 | 2.371(2) | Sm(2)-O(8)    | 2.407(3) |
| Sm(2)-O(9)    | 2.463(2) | Sm(2)-O(12)#3 | 2.481(2) |
| Sm(2)-O(10)   | 2.495(2) | Sm(2)-O(3W)   | 2.511(3) |
| Sm(2)-O(2W)   | 2.527(2) | Sm(2)-O(11)#3 | 2.669(2) |
| O(1)-C(1)     | 1.255(4) | O(2)-C(1)     | 1.265(4) |
| O(3)-C(8)     | 1.267(4) | O(3)-Sm(1)#2  | 2.431(2) |
| O(3)-Sm(1)#7  | 2.718(2) | O(4)-C(8)     | 1.243(4) |
| O(4)-Sm(1)#7  | 2.448(2) | O(5)-C(11)    | 1.260(4) |
| O(6)-C(11)    | 1.249(4) | O(6)-Sm(1)#1  | 2.369(2) |
| O(7)-C(18)    | 1.264(4) | O(7)-Sm(2)#5  | 2.369(2) |
| O(8)-C(18)    | 1.253(4) | O(9)-C(21)    | 1.258(4) |
| O(10)-C(21)   | 1.257(4) | O(11)-C(28)   | 1.272(4) |
| O(11)-Sm(2)#6 | 2.371(2) | O(11)-Sm(2)#7 | 2.669(2) |
| O(12)-C(28)   | 1.253(4) | O(12)-Sm(2)#7 | 2.481(2) |
| N(1)-C(9)     | 1.338(5) | N(1)-N(2)     | 1.365(4) |

|                     |           |                     |            |
|---------------------|-----------|---------------------|------------|
| N(1)-C(6)           | 1.433(4)  | N(2)-C(10)          | 1.318(5)   |
| N(3)-C(9)           | 1.313(5)  | N(3)-C(10)          | 1.346(6)   |
| N(4)-C(19)          | 1.336(5)  | N(4)-N(5)           | 1.345(4)   |
| N(4)-C(16)          | 1.440(4)  | N(5)-C(20)          | 1.322(5)   |
| N(6)-C(19)          | 1.297(5)  | N(6)-C(20)          | 1.342(6)   |
| N(7)-C(30)          | 1.333(4)  | N(7)-N(8)           | 1.371(4)   |
| N(7)-C(26)          | 1.431(4)  | N(8)-C(29)          | 1.306(5)   |
| N(9)-C(30)          | 1.322(4)  | N(9)-C(29)          | 1.358(5)   |
| N(9)-Sm(1)#8        | 2.619(3)  |                     |            |
| O(6)#1-Sm(1)-O(2)   | 140.09(9) | O(6)#1-Sm(1)-O(5)   | 133.48(8)  |
| O(2)-Sm(1)-O(5)     | 80.73(9)  | O(6)#1-Sm(1)-O(3)#2 | 77.50(8)   |
| O(2)-Sm(1)-O(3)#2   | 101.61(8) | O(5)-Sm(1)-O(3)#2   | 71.44(8)   |
| O(6)#1-Sm(1)-O(4)#3 | 81.34(9)  | O(2)-Sm(1)-O(4)#3   | 125.87(8)  |
| O(5)-Sm(1)-O(4)#3   | 88.90(10) | O(3)#2-Sm(1)-O(4)#3 | 124.98(8)  |
| O(6)#1-Sm(1)-O(1W)  | 77.79(8)  | O(2)-Sm(1)-O(1W)    | 81.35(9)   |
| O(5)-Sm(1)-O(1W)    | 143.41(8) | O(3)#2-Sm(1)-O(1W)  | 143.79(9)  |
| O(4)#3-Sm(1)-O(1W)  | 76.34(10) | O(6)#1-Sm(1)-O(1)   | 144.39(8)  |
| O(2)-Sm(1)-O(1)     | 52.17(7)  | O(5)-Sm(1)-O(1)     | 72.05(8)   |
| O(3)#2-Sm(1)-O(1)   | 137.94(8) | O(4)#3-Sm(1)-O(1)   | 74.02(8)   |
| O(1W)-Sm(1)-O(1)    | 71.73(8)  | O(6)#1-Sm(1)-N(9)#4 | 71.29(9)   |
| O(2)-Sm(1)-N(9)#4   | 70.43(9)  | O(5)-Sm(1)-N(9)#4   | 127.90(10) |

|                      |           |                       |            |
|----------------------|-----------|-----------------------|------------|
| O(3)#2-Sm(1)-N(9)#4  | 73.14(9)  | O(4)#3-Sm(1)-N(9)#4   | 143.11(11) |
| O(1W)-Sm(1)-N(9)#4   | 74.10(10) | O(1)-Sm(1)-N(9)#4     | 115.89(8)  |
| O(6)#1-Sm(1)-O(3)#3  | 65.98(8)  | O(2)-Sm(1)-O(3)#3     | 153.23(8)  |
| O(5)-Sm(1)-O(3)#3    | 72.97(8)  | O(3)#2-Sm(1)-O(3)#3   | 74.95(8)   |
| O(4)#3-Sm(1)-O(3)#3  | 50.06(7)  | O(1W)-Sm(1)-O(3)#3    | 117.42(8)  |
| O(1)-Sm(1)-O(3)#3    | 112.91(7) | N(9)#4-Sm(1)-O(3)#3   | 130.85(8)  |
| O(7)#5-Sm(2)-O(11)#6 | 76.16(9)  | O(7)#5-Sm(2)-O(8)     | 134.21(9)  |
| O(11)#6-Sm(2)-O(8)   | 74.76(9)  | O(7)#5-Sm(2)-O(9)     | 144.14(9)  |
| O(11)#6-Sm(2)-O(9)   | 139.63(9) | O(8)-Sm(2)-O(9)       | 73.26(10)  |
| O(7)#5-Sm(2)-O(12)#3 | 85.39(9)  | O(11)#6-Sm(2)-O(12)#3 | 123.79(8)  |
| O(8)-Sm(2)-O(12)#3   | 82.32(10) | O(9)-Sm(2)-O(12)#3    | 75.19(8)   |
| O(7)#5-Sm(2)-O(10)   | 144.57(8) | O(11)#6-Sm(2)-O(10)   | 94.70(8)   |
| O(8)-Sm(2)-O(10)     | 72.57(9)  | O(9)-Sm(2)-O(10)      | 52.37(8)   |
| O(12)#3-Sm(2)-O(10)  | 126.13(8) | O(7)#5-Sm(2)-O(3W)    | 74.81(10)  |
| O(11)#6-Sm(2)-O(3W)  | 142.84(9) | O(8)-Sm(2)-O(3W)      | 142.28(10) |
| O(9)-Sm(2)-O(3W)     | 71.46(11) | O(12)#3-Sm(2)-O(3W)   | 76.24(11)  |
| O(10)-Sm(2)-O(3W)    | 95.65(11) | O(7)#5-Sm(2)-O(2W)    | 74.71(9)   |
| O(11)#6-Sm(2)-O(2W)  | 76.73(8)  | O(8)-Sm(2)-O(2W)      | 130.03(10) |
| O(9)-Sm(2)-O(2W)     | 106.46(9) | O(12)#3-Sm(2)-O(2W)   | 147.28(10) |
| O(10)-Sm(2)-O(2W)    | 69.87(8)  | O(3W)-Sm(2)-O(2W)     | 73.63(10)  |
| O(7)#5-Sm(2)-O(11)#3 | 67.42(8)  | O(11)#6-Sm(2)-O(11)#3 | 73.55(8)   |



|                       |            |                     |           |
|-----------------------|------------|---------------------|-----------|
| O(8)-Sm(2)-O(11)#3    | 70.86(9)   | O(9)-Sm(2)-O(11)#3  | 117.10(8) |
| O(12)#3-Sm(2)-O(11)#3 | 50.42(7)   | O(10)-Sm(2)-O(11)#3 | 143.35(9) |
| O(3W)-Sm(2)-O(11)#3   | 114.85(10) | O(2W)-Sm(2)-O(11)#3 | 136.16(7) |
| <b>MOF-Tb</b>         |            |                     |           |
| Tb(1)-O(6)#1          | 2.321(2)   | Tb(1)-O(2)          | 2.357(2)  |
| Tb(1)-O(5)            | 2.370(3)   | Tb(1)-O(3)#2        | 2.373(2)  |
| Tb(1)-O(4)#3          | 2.397(2)   | Tb(1)-O(1W)         | 2.424(3)  |
| Tb(1)-O(1)            | 2.568(2)   | Tb(1)-N(9)#4        | 2.587(3)  |
| Tb(1)-O(3)#3          | 2.724(2)   | Tb(2)-O(11)#5       | 2.322(2)  |
| Tb(2)-O(7)#6          | 2.325(2)   | Tb(2)-O(8)          | 2.365(3)  |
| Tb(2)-O(9)            | 2.426(2)   | Tb(2)-O(12)#3       | 2.436(2)  |
| Tb(2)-O(10)           | 2.455(2)   | Tb(2)-O(3W)         | 2.468(3)  |
| Tb(2)-O(2W)           | 2.486(2)   | Tb(2)-O(11)#3       | 2.661(2)  |
| O(1)-C(1)             | 1.257(4)   | O(2)-C(1)           | 1.261(4)  |
| O(3)-C(8)             | 1.263(4)   | O(3)-Tb(1)#2        | 2.374(2)  |
| O(3)-Tb(1)#7          | 2.724(2)   | O(4)-C(8)           | 1.255(4)  |
| O(4)-Tb(1)#7          | 2.397(2)   | O(5)-C(11)          | 1.264(4)  |
| O(6)-C(11)            | 1.251(4)   | O(6)-Tb(1)#1        | 2.321(2)  |
| O(7)-C(18)            | 1.263(4)   | O(7)-Tb(2)#6        | 2.325(2)  |
| O(8)-C(18)            | 1.249(4)   | O(9)-C(21)          | 1.254(4)  |
| O(10)-C(21)           | 1.254(4)   | O(11)-C(28)         | 1.272(4)  |

|                     |           |                     |           |
|---------------------|-----------|---------------------|-----------|
| O(11)-Tb(2)#5       | 2.322(2)  | O(11)-Tb(2)#7       | 2.661(2)  |
| O(12)-C(28)         | 1.249(4)  | O(12)-Tb(2)#7       | 2.436(2)  |
| N(1)-C(9)           | 1.335(5)  | N(1)-N(2)           | 1.357(4)  |
| N(1)-C(6)           | 1.441(4)  | N(2)-C(10)          | 1.319(5)  |
| N(3)-C(9)           | 1.306(5)  | N(3)-C(10)          | 1.363(6)  |
| N(4)-C(19)          | 1.336(5)  | N(4)-N(5)           | 1.352(4)  |
| N(4)-C(16)          | 1.439(4)  | N(5)-C(20)          | 1.318(6)  |
| N(6)-C(19)          | 1.300(5)  | N(6)-C(20)          | 1.358(6)  |
| N(7)-C(30)          | 1.334(4)  | N(7)-N(8)           | 1.367(4)  |
| N(7)-C(26)          | 1.433(4)  | N(8)-C(29)          | 1.305(5)  |
| N(9)-C(30)          | 1.324(4)  | N(9)-C(29)          | 1.363(5)  |
| N(9)-Tb(1)#8        | 2.587(3)  |                     |           |
| O(6)#1-Tb(1)-O(2)   | 140.80(9) | O(6)#1-Tb(1)-O(5)   | 133.51(8) |
| O(2)-Tb(1)-O(5)     | 80.16(9)  | O(6)#1-Tb(1)-O(3)#2 | 77.79(8)  |
| O(2)-Tb(1)-O(3)#2   | 101.04(8) | O(5)-Tb(1)-O(3)#2   | 71.78(8)  |
| O(6)#1-Tb(1)-O(4)#3 | 81.23(10) | O(2)-Tb(1)-O(4)#3   | 126.01(8) |
| O(5)-Tb(1)-O(4)#3   | 88.13(10) | O(3)#2-Tb(1)-O(4)#3 | 124.84(8) |
| O(6)#1-Tb(1)-O(1W)  | 77.56(9)  | O(2)-Tb(1)-O(1W)    | 82.08(9)  |
| O(5)-Tb(1)-O(1W)    | 143.29(9) | O(3)#2-Tb(1)-O(1W)  | 143.58(9) |
| O(4)#3-Tb(1)-O(1W)  | 76.84(10) | O(6)#1-Tb(1)-O(1)   | 143.79(8) |
| O(2)-Tb(1)-O(1)     | 52.71(7)  | O(5)-Tb(1)-O(1)     | 71.85(8)  |

|                       |            |                      |            |
|-----------------------|------------|----------------------|------------|
| O(3)#2-Tb(1)-O(1)     | 138.19(8)  | O(4)#3-Tb(1)-O(1)    | 73.50(8)   |
| O(1W)-Tb(1)-O(1)      | 71.80(9)   | O(6)#1-Tb(1)-N(9)#4  | 71.53(9)   |
| O(2)-Tb(1)-N(9)#4     | 70.82(9)   | O(5)-Tb(1)-N(9)#4    | 128.18(10) |
| O(3)#2-Tb(1)-N(9)#4   | 72.90(9)   | O(4)#3-Tb(1)-N(9)#4  | 143.59(11) |
| O(1W)-Tb(1)-N(9)#4    | 74.08(10)  | O(1)-Tb(1)-N(9)#4    | 116.40(8)  |
| O(6)#1-Tb(1)-O(3)#3   | 65.71(8)   | O(2)-Tb(1)-O(3)#3    | 152.62(8)  |
| O(5)-Tb(1)-O(3)#3     | 72.79(8)   | O(3)#2-Tb(1)-O(3)#3  | 74.70(8)   |
| O(4)#3-Tb(1)-O(3)#3   | 50.19(8)   | O(1W)-Tb(1)-O(3)#3   | 117.72(8)  |
| O(1)-Tb(1)-O(3)#3     | 112.79(7)  | N(9)#4-Tb(1)-O(3)#3  | 130.48(8)  |
| O(11)#5-Tb(2)-O(7)#6  | 77.10(9)   | O(11)#5-Tb(2)-O(8)   | 75.32(9)   |
| O(7)#6-Tb(2)-O(8)     | 134.35(9)  | O(11)#5-Tb(2)-O(9)   | 139.09(9)  |
| O(7)#6-Tb(2)-O(9)     | 143.55(10) | O(8)-Tb(2)-O(9)      | 73.79(10)  |
| O(11)#5-Tb(2)-O(12)#3 | 124.52(8)  | O(7)#6-Tb(2)-O(12)#3 | 85.37(9)   |
| O(8)-Tb(2)-O(12)#3    | 81.24(11)  | O(9)-Tb(2)-O(12)#3   | 76.00(8)   |
| O(11)#5-Tb(2)-O(10)   | 92.32(8)   | O(7)#6-Tb(2)-O(10)   | 144.17(9)  |
| O(8)-Tb(2)-O(10)      | 72.61(10)  | O(9)-Tb(2)-O(10)     | 53.06(8)   |
| O(12)#3-Tb(2)-O(10)   | 127.12(8)  | O(11)#5-Tb(2)-O(3W)  | 143.15(10) |
| O(7)#6-Tb(2)-O(3W)    | 74.27(11)  | O(8)-Tb(2)-O(3W)     | 141.46(10) |
| O(9)-Tb(2)-O(3W)      | 70.92(11)  | O(12)#3-Tb(2)-O(3W)  | 75.72(11)  |
| O(10)-Tb(2)-O(3W)     | 97.45(12)  | O(11)#5-Tb(2)-O(2W)  | 77.16(8)   |
| O(7)#6-Tb(2)-O(2W)    | 74.06(9)   | O(8)-Tb(2)-O(2W)     | 132.12(10) |

|                       |            |                      |            |
|-----------------------|------------|----------------------|------------|
| O(9)-Tb(2)-O(2W)      | 105.17(9)  | O(12)#3-Tb(2)-O(2W)  | 146.20(10) |
| O(10)-Tb(2)-O(2W)     | 70.20(9)   | O(3W)-Tb(2)-O(2W)    | 73.06(11)  |
| O(11)#5-Tb(2)-O(11)#3 | 73.96(8)   | O(7)#6-Tb(2)-O(11)#3 | 67.21(8)   |
| O(8)-Tb(2)-O(11)#3    | 70.58(9)   | O(9)-Tb(2)-O(11)#3   | 118.73(8)  |
| O(12)#3-Tb(2)-O(11)#3 | 50.82(8)   | O(10)-Tb(2)-O(11)#3  | 142.87(9)  |
| O(3W)-Tb(2)-O(11)#3   | 114.33(11) | O(2W)-Tb(2)-O(11)#3  | 135.65(8)  |

Symmetry codes:

For **MOF-Sm**: #1 (-x, -y+1, -z), #2 (-x+1, -y+1, -z), #3 (x-1, y, z), #4 (x, y, z-1), #5 (-x, -y, -z+1), #6 (-x+1, -y, -z+1), #7 (x+1, y, z), #8 (x, y, z+1);

For **MOF-Tb**: #1 (-x, -y+1, -z), #2 (-x+1, -y+1, -z), #3 (x-1, y, z), #4 (x, y, z-1), #5 (-x+1, -y, -z+1), #6 (-x, -y, -z+1), #7 (x+1, y, z), #8 (x, y, z+1).

**Table S3 The photocatalytic Degradation of Aqueous dyes by selected Ln-based MOFs**

| Formula | Ligand | Efficiency (%) | Light resou | refere nce |
|---------|--------|----------------|-------------|------------|
|---------|--------|----------------|-------------|------------|

|                                                                                                 |                                                                                                 |                      |            |           |
|-------------------------------------------------------------------------------------------------|-------------------------------------------------------------------------------------------------|----------------------|------------|-----------|
|                                                                                                 |                                                                                                 |                      | rce        |           |
| $La_2(\text{adda})_3(\text{H}_2\text{O})_2]$                                                    | $H_2\text{adda} = (2E,2'E)-3,3'$ -<br>(anthracene-9,10-diyl) diacrylic acid                     | 91.2 (Rh B, 120 min) | Vis        | 1         |
| $[Ce(\text{H}_2\text{L})_{1.5}(\text{H}_2\text{O})(\text{DMF})]$                                | $H_2\text{L} = 4,4'$ -(diethynylanthracene-9,10-diyl)dibenzoic acid                             | 99(MB,12 min)        | vis        | 2         |
| $[Pr(\text{TBDC})_{1.5}(\text{H}_2\text{O})]$                                                   | $H_2\text{TBDC} = 2,3,5,6$ tetramethyl-1,4-benzenedicarboxylic acid                             | 100(CR, 24h)         | xenon lamp | 3         |
| $[(\text{CH}_3)_2\text{NH}_2]_2[\text{Eu}_6(\text{OH})_8(\text{ADBA})_6(\text{H}_2\text{O})_6]$ | $H_2\text{ADBA} = 4,4'$ -(9,10-anthracenediyl)dibenzoic acid                                    | (MB)                 | vis        | 4         |
| $[\text{Eu}(\text{HL})_3]$                                                                      | $H_2\text{L} =$ Chalcone dicarboxylic acid ligand                                               | 44% (Rh B, 80min)    | UV         | 5         |
| $[\text{Gd}(\text{L})_{1.5}(\text{H}_2\text{O})_2]$                                             | $H_2\text{L} = N,N'$ dioxide-3,3'benzocinnoline dicarboxylic acid                               | 81.6% (Rh B, 120min) | UV         | 6         |
| $[\text{Tb}(2\text{-NCP})(\text{AA})]$                                                          | 2-HNCP= 2-(2-carboxyphenyl)imidazo(4,5-f)-(1,10)phenanthroline and $H_2\text{AA} =$ adipic acid | 41(MB. 400)          | vis        | 7         |
| $[(\text{UO}_2(\text{pydc})(\text{H}_2\text{O})]$                                               | $H_2\text{pydc} = 2,5$ -pyridinedicarboxylic acid                                               | 39(Rhb, 90)          | UV         | 8         |
| $[\text{Yb}(\text{L}^2)_{0.5}(\text{NO}_3)(\text{DMF})_2]$                                      | $H_4\text{L}^2 = 5,5'$ -(diazene-1,2-diyl)diisophthalic acid                                    | 78%(Rh b, 120)       | UV         | 9         |
| $[\text{Ln}_2(\text{H}_2\text{O})_3(\text{L})_3]$                                               | $H_2\text{L} = 5$ -(1H-1,2,4-triazol-1-yl)-1,3-benzenedicarboxylic acid                         | 71.55 (MV, 40min)    | UV         | This work |
| Rh B = Rhodamine B; MB = Methylene blue ; CR= Congo red                                         |                                                                                                 |                      |            |           |

## References

1. W. Ren, F. Han, J.-K. Lu, Y.-C. Hu, *J. Inorg. Organomet. Polym. Mater.*, 2020, **30**, 1782–1789.
2. Q. Xia, X. Yu, H. Zhao, S. Wang, H. Wang, Z. Guo, H. Xing, *Cryst. Growth Des.*, 2017, **17**, 4189–4195.
3. X. Du, H. He, L. Du, W. Li, Y. Wang, Q. Jiang, L. Yang, J. Zhang, S. Guo, *Polyhedron*, 2019, **171**, 221–227.
4. X. Liu, B. Liu, G. Li, Y. Liu, *J. Mater. Chem. A*, 2018, **6**, 17177–17185.

5. W. Pan, C. Gong, X. Zeng, C. Hub, Y. Zhang, D.-R. Zhu, H. Xu, H. Guo, J. Zhang, J. Xie, *Polyhedron*, 2019, **169**, 24–31.
6. W. Wu, W. Liu, X. Shen, H. Zhong, J. Xu, B. Li, J.-Q. Liu, A. K. Singh, A. Singh, A. Kumar, *Inorg. Chem. Commun.*, 2018, **95**, 104-106
7. S. Ren, W. Jiang, Q. Wang, Z. Li, Y. Qiao, G. Che, *RSC Adv.*, 2019, **9**, 3102–3112
8. Z.-X. Si, W. Xu, Y.-Q. Zheng, *J. Solid State Chem.*, 2016, **239**, 139–144.
9. J.-J. Wang, Y. Chen, M.-J. Liu, R.-Y. Fan, P.-P. Si, J. Yang, Y.-Y. Pan, Y. Chen, S.-S. Zhao, J. Xu, *Polyhedron*, 2018, **154**, 411–419.
